# Supplementary material
Source: publisher figshare collection journal article supplement (https://acs.figshare.com/ndownloader/files/14518019)
Supplement: Supplementary file 1 [file 14518019]

## **Supplemental Information**

# **Characterizing the Incorporation of DNA into Single NIPAm Hydrogel Nanoparticles with Surface Plasmon Resonance Imaging Measurements**

**Brandon M. Matthews, Adam M. Maley, Kellen M. Kartub, and Robert M. Corn**

**Department of Chemistry, University of California-Irvine, Irvine, CA 92697, USA.**

## **Table of Contents**

I. Fluorescence Loss Experiments

II. Statistical Analysis of SPRI Microscopy of Complementary DNA Hybridization

## I. Fluorescence Loss Measurements

Fluorescence spectra were obtained using a JASCO FP-6300 Spectrofluorometer (JASCO Analytical Instruments, Easton, MD). For SYBR Green staining experiments, parallel solutions of a 1 to 10 dilution of D1-HNPs were mixed with either 10 nM D1c or D1nc, and permitted to sit for 30 minutes. Following, SYBR Green was added to a final concentration of 0.003x, and allowed to sit for an additional 30 minutes. To remove excess unbound ssDNA or SYBR Green, Amicon Ultra – 0.5 mL Centrifugal Filter Devices 50k NMWL (MilliporeSigma, Burlington, MA) were used. Filters were pre-rinsed with buffer and centrifuged at  $14,000 \times g$  for 15 minutes. 200  $\mu\text{L}$  of D1-HNP mixtures were then added to the filters, and centrifuged three times at  $14,000 \times g$  for 15 minutes. Each wash cycle was resuspended to 200  $\mu\text{L}$  total volume, and D1-HNPs were recovered from the filters by spinning at  $1,000 \times g$  for 2 minutes after the final wash. The collected mixture was brought to a total volume of 200  $\mu\text{L}$ , and fluorescence measured. For fluorescence loss measurements, a standard curve was made using D1c fluorescently labeled DNA (D1c\*) from 0 to 10 nM. Then, three 10 nM D1c\*, 1 to 10 dilution of D1-HNPs mixtures were prepared and brought to a final volume of 1 mL. After half an hour, the mixtures were spun at 14,000 rpm for 15 minutes to create a HNP pellet at the bottom of the vial. The supernatant was removed, and measured.

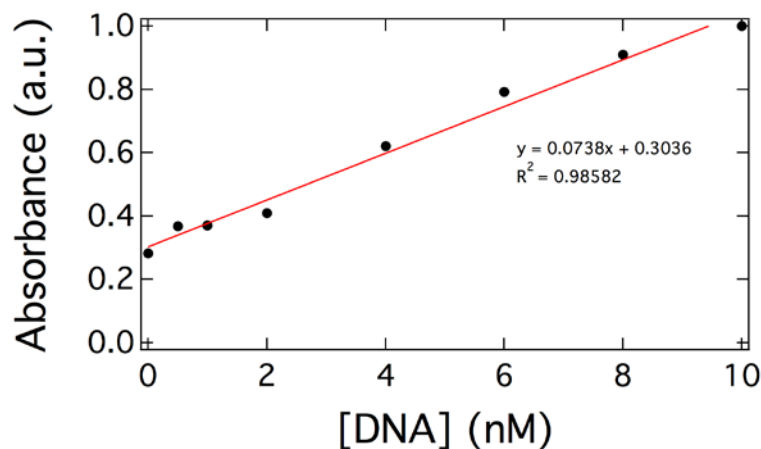

**Figure S1.** A fluorescence curve was plotted to calculate the fluorescence of the supernatant. Approximately 35% of fluorescently labeled DNA was hybridized into D1-HNP, equal to 3.47 nM of accessible ssDNA within the HNP.

## II. Statistical Analysis of SPRI Microscopy of Complementary DNA Hybridization

Table S1. SPRI Microscopy for D1c binding to D1-HNPs.

| D1c<br>concentration<br>(nM) | $\langle \Delta \% R_{NP} \rangle$<br>> | standard<br>deviation<br>(s) | 95%<br>CI | # of NPs |
|------------------------------|-----------------------------------------|------------------------------|-----------|----------|
| 0.1                          | 5.60                                    | 1.84                         | 0.22      | 276      |
| 1                            | 5.94                                    | 2.20                         | 0.26      | 282      |
| 3                            | 6.75                                    | 2.60                         | 0.30      | 414      |
| 5                            | 7.02                                    | 3.11                         | 0.35      | 304      |
| 10                           | 6.98                                    | 2.40                         | 0.27      | 307      |
| 100                          | 7.11                                    | 2.20                         | 0.25      | 314      |
